# Supplementary material for: Application of Pharmacokinetic-Pharmacodynamic Modeling to Inform Translation of In Vitro NaV1.7 Inhibition to In Vivo Pharmacological Response in Non-human Primate
Source: PubMed Central journal article supplement (PMC7473964; doi:10.1007/s11095-020-02914-9), 2020-09-04
Supplement: 11095_2020_2914_MOESM1_ESM.pdf [file 11095_2020_2914_MOESM1_ESM.pdf]

## Online Resource 1

Journal: Pharmaceutical Research

Title: Application of pharmacokinetic-pharmacodynamic modeling to inform translation of *in vitro* NaV1.7 inhibition to *in vivo* pharmacological response in non-human primate

Authors: Jeanine E. Ballard<sup>1</sup>, Parul Pall<sup>2</sup>, Joshua Vardigan<sup>2</sup>, Fuqiang Zhao<sup>3</sup>, Marie A. Holahan<sup>3</sup>, Richard Kraus<sup>4</sup>, Yuxing Li<sup>4</sup>, Darrell Henze<sup>5</sup>, Andrea Houghton<sup>5</sup>, Christopher S. Burgey<sup>6</sup>, Christopher Gibson<sup>1</sup>

Affiliations: Merck & Co., Inc., Kenilworth, NJ USA

<sup>1</sup> Pharmacokinetics, Pharmacodynamics, and Drug Metabolism

<sup>2</sup> In Vivo Neuropharmacology

<sup>3</sup> MR-CT-US & Optical Imaging

<sup>4</sup> Neuronal Signaling

<sup>5</sup> Quantitative Biosciences

<sup>6</sup> Discovery Chemistry

Corresponding author: Jeanine E. Ballard

[jeanine\\_ballard@merck.com](mailto:jeanine_ballard@merck.com)

Supplementary Table S1. Study design details for fMRI olfaction assay

| Test Compound | Bolus Dose (mg/kg) | Infusion Dose (mg/kg/hr) | Number of Animals |
|---------------|--------------------|--------------------------|-------------------|
| vehicle       | 0                  | 0                        | 6                 |
| 1             | 1.5                | 7.5                      | 6                 |
| 2             | 4                  | 5.5                      | 5                 |
| 3             | 0.32               | 2.8                      | 6                 |
|               | 0.65               | 5.6                      | 6                 |
| 4             | 0.19               | 0.16                     | 6                 |
|               | 0.75               | 0.88                     | 6                 |
| 5             | 0.23               | 2.1                      | 6                 |
|               | 0.46               | 4.2                      | 5                 |
| 6             | 0.49               | 0.85                     | 5                 |
|               | 0.98               | 1.7                      | 4                 |
|               | 1.47               | 2.55                     | 4                 |
|               | 1.67               | 3.33                     | 1                 |
|               | 2.5                | 5                        | 6                 |
|               | 4.41               | 7.65                     | 5                 |
|               | 5                  | 10                       | 1                 |
|               | 8.82               | 15.3                     | 5                 |
| 7             | 0.32               | 4.21                     | 4                 |
|               | 1.6                | 21                       | 5                 |
| 8             | 0.76               | 3.81                     | 5                 |
|               | 2.3                | 11.5                     | 5                 |
| 9             | 0.31               | 1.66                     | 4                 |
| 10            | 0.6                | 9                        | 2                 |
|               | 1.2                | 18                       | 3                 |
| 11            | 0.2                | 0.35                     | 4                 |

|    |      |      |   |
|----|------|------|---|
| 12 | 0.1  | 0.5  | 3 |
|    | 0.5  | 2.5  | 3 |
| 13 | 0.14 | 0.35 | 2 |
|    | 0.28 | 0.7  | 1 |
|    | 0.42 | 1.05 | 5 |
|    | 0.84 | 2.1  | 5 |
| 14 | 0.5  | 1    | 3 |
|    | 1.5  | 3    | 3 |
|    | 3    | 6    | 4 |
| 15 | 10   | 25   | 3 |
| 16 | 1    | 1.5  | 2 |
|    | 3    | 5    | 2 |
| 17 | 0.6  | 0.6  | 3 |
| 18 | 0.6  | 1.4  | 2 |
|    | 1.8  | 4.2  | 2 |
| 19 | 0.8  | 2.8  | 2 |
|    | 2.5  | 8.5  | 1 |
| 20 | 5    | 15   | 5 |
| 21 | 0.2  | 0.2  | 3 |
|    | 0.6  | 0.6  | 1 |
|    | 1.8  | 1.8  | 1 |
| 22 | 0.3  | 0.3  | 3 |
|    | 0.9  | 0.9  | 3 |
| 23 | 0.25 | 0.5  | 3 |
| 24 | 0.03 | 0.03 | 3 |
|    | 0.07 | 0.07 | 6 |
|    | 0.15 | 0.15 | 3 |

|    |      |     |   |
|----|------|-----|---|
|    | 0.5  | 0.5 | 3 |
| 25 | 0.4  | 0.4 | 1 |
|    | 1.2  | 1.2 | 3 |
| 26 | 0.5  | 1   | 4 |
| 27 | 0.25 | 0.4 | 3 |
|    | 0.8  | 1.2 | 3 |

Supplementary Table S2. Study design details for thermode assay

| Test Compound | Subcutaneous Dose (mg/kg) | Number of Animals |
|---------------|---------------------------|-------------------|
| 6             | 0                         | 7                 |
|               | 10                        | 2                 |
|               | 20                        | 7                 |
| 12            | 0                         | 8                 |
|               | 1                         | 7                 |
|               | 2.5                       | 7                 |
|               | 5                         | 8                 |
| 13            | 0                         | 6                 |
|               | 0.5                       | 6                 |
|               | 1                         | 6                 |
|               | 2.5                       | 6                 |
|               | 5                         | 6                 |
| 21            | 0                         | 6                 |
|               | 1                         | 6                 |
|               | 2                         | 6                 |
|               | 5                         | 6                 |
| 22            | 0                         | 7                 |
|               | 1                         | 7                 |
|               | 3                         | 7                 |
|               | 5                         | 4                 |
|               | 10                        | 3                 |
| 24            | 0                         | 7                 |
|               | 0.5                       | 7                 |
|               | 1                         | 7                 |
|               | 2                         | 7                 |

|    |     |   |
|----|-----|---|
| 25 | 0   | 8 |
|    | 2.5 | 8 |
|    | 5   | 8 |
|    | 10  | 8 |

Supplementary Table S3. Study design details for satellite PK studies

| Test Compound | IV Bolus Dose (mg/kg) | IV Infusion Dose (mg/kg/hr) | Number of Animals |
|---------------|-----------------------|-----------------------------|-------------------|
| 3             | 2                     |                             | 2                 |
| 6             |                       | 5                           | 3                 |
|               |                       | 15                          | 3                 |
| 12            | 0.5                   |                             | 3                 |
| 13            |                       | 2                           | 3                 |
|               |                       | 8                           | 3                 |
| 14            | 0.05                  |                             | 2                 |
| 16            | 1                     |                             | 3                 |
| 18            | 0.05                  |                             | 2                 |
| 19            | 0.05                  |                             | 2                 |
| 21            | 0.5                   |                             | 3                 |
| 22            | 0.05                  |                             | 2                 |
| 24            | 0.05                  |                             | 2                 |
| 25            | 0.05                  |                             | 2                 |
| 27            | 0.2                   |                             | 2                 |
